# Supplementary material for: Perceived cognitive functioning and its influence on emotional vulnerability in breast cancer
Source: PubMed Central journal article supplement (PMC6710691; doi:10.1177/2055102919871661), 2019-08-23
Supplement: Supplement_Table.pdf [file Supplement_Table.pdf]

**Table 1** Participants' Breast Cancer Specific Clinical History, Psychological and Neurological Medical History (N = 132)

|                              |                                                           | Number of<br>Participants (%) |
|------------------------------|-----------------------------------------------------------|-------------------------------|
| <b>Diagnosis of Breast</b>   |                                                           |                               |
| Cancer                       | Primary Breast Cancer                                     | 119 (90.2)                    |
|                              | Secondary Breast Cancer                                   | 12 (9.1)                      |
|                              | Stage of Breast Cancer Unreported                         | 1 (0.8)                       |
| <b>Type of Breast Cancer</b> |                                                           |                               |
| Diagnosed                    | Ductal carcinoma in Situ (DCIS)                           | 21 (15.9)                     |
|                              | Invasive Ductal Carcinoma (IDC)                           | 53 (40.2)                     |
|                              | Invasive Ductal Carcinoma (IDC) with Metaplastic          | 1 (0.8)                       |
|                              | Mixed IDC and DCIS                                        | 29 (22.0)                     |
|                              | Mixed IDC and DCIS with Cribriform Breast Cancer          | 1 (0.8)                       |
|                              | Invasive Lobular Breast Cancer                            | 14 (10.6)                     |
|                              | Inflammatory Breast Cancer                                | 6 (4.5)                       |
|                              | Metaplastic Breast Cancer                                 | 1 (0.8)                       |
|                              | Ductal Carcinoma in Situ (DCIS) with Invasive Lobular     | 1 (0.8)                       |
|                              | Mixed Ductal and Lobular                                  | 1 (0.8)                       |
|                              | Inflammatory Breast Cancer with Mediastinal Nodal Disease | 1 (0.8)                       |
|                              | Other                                                     | 2 (1.5)                       |
|                              | Type Unreported                                           | 1 (0.8)                       |
| Grade of Tumour              | Low (Grade One)                                           | 18 (13.6)                     |
|                              | Moderate (Grade Two)                                      | 52 (39.4)                     |
|                              | High (Grade Three)                                        | 59 (44.7)                     |
|                              | Grade Unreported                                          | 3 (2.3)                       |

## Lymph Nodes

|             |                     |           |
|-------------|---------------------|-----------|
| Involvement | Yes                 | 76 (57.6) |
|             | No                  | 54 (40.9) |
|             | Involvement Unknown | 2 (1.5)   |

## Quantity of Lymph

|                |                  |           |
|----------------|------------------|-----------|
| Nodes Involved | No Lymph Nodes   | 53 (40.2) |
|                | 1-5              | 48 (36.4) |
|                | 6-10             | 9 (6.8)   |
|                | 11+              | 12 (9.1)  |
|                | Quantity Unknown | 6 (4.5)   |
|                | Unreported       | 4 (3.0)   |

## Hormone Receptor

|        |                         |           |
|--------|-------------------------|-----------|
| Status | ER+PR+Her2+             | 11 (8.3)  |
|        | ER+PR+Her2-             | 46 (34.8) |
|        | ER+PR-Her2+             | 4 (3.0)   |
|        | ER+PR-Her2-             | 29 (22.0) |
|        | ER-PR+Her2-             | 2 (1.5)   |
|        | ER-PR-Her2+             | 11 (8.3)  |
|        | ER-PR-Her2-             | 13 (9.8)  |
|        | Receptor Status Unknown | 1 (0.8)   |
|        | Unreported              | 15 (11.4) |

|                    |                                                      |           |
|--------------------|------------------------------------------------------|-----------|
| Treatment Received | Neo-adjuvant Chemotherapy, Lumpectomy & Radiotherapy | 15 (11.4) |
|--------------------|------------------------------------------------------|-----------|

|                     |                                                      |            |
|---------------------|------------------------------------------------------|------------|
|                     | Neo-adjuvant Chemotherapy, Mastectomy & Radiotherapy | 24 (18.2)  |
|                     | Neo-adjuvant Chemotherapy & Mastectomy               | 7 (5.3)    |
|                     | Lumpectomy, Chemotherapy & Radiotherapy              | 20 (15.2)  |
|                     | Mastectomy, Chemotherapy & Radiotherapy              | 16 (12.1)  |
|                     | Mastectomy & Chemotherapy                            | 14 (10.6)  |
|                     | Lumpectomy & Radiotherapy                            | 17 (12.9)  |
|                     | Mastectomy                                           | 18 (13.6)  |
|                     | Lumpectomy, Radiotherapy & Mastectomy                | 1 (0.8)    |
| Class of Mastectomy |                                                      |            |
| Procedure           | Uni-lateral                                          | 55 (41.7)  |
|                     | Bi-lateral                                           | 24 (18.2)  |
|                     | No Mastectomy                                        | 49 (37.1)  |
|                     | Unreported                                           | 4 (3.0)    |
| Cycles of Herceptin |                                                      |            |
| Injections Received | 9 cycles                                             | 0 (0)      |
|                     | 18 cycles                                            | 21 (15.9)  |
|                     | Complete Herceptin Cycles                            | 1 (0.8)    |
|                     | No Herceptin Cycles Received                         | 110 (83.3) |
| Endocrine Therapies |                                                      |            |
| Administered        | Yes                                                  | 93 (70.5)  |
|                     | No                                                   | 39 (29.5)  |
| Class of Endocrine  |                                                      |            |
| Therapies Received  | Tamoxifen                                            | 43 (32.6)  |
|                     | Zoladex                                              | 3 (2.3)    |

|                          |                                                                  |            |
|--------------------------|------------------------------------------------------------------|------------|
|                          | Aromatase Inhibitor                                              | 28 (21.2)  |
|                          | Zoladex & Tamoxifen                                              | 3 (2.3)    |
|                          | Zoladex & Aromatase Inhibitor                                    | 12 (9.1)   |
|                          | Prescribed but not taken by the Participant                      | 3 (2.3)    |
|                          | Type of Therapies Unreported                                     | 1 (0.8)    |
|                          | No Endocrine Therapy Received                                    | 39 (29.5)  |
| Diagnosis of Psychiatric |                                                                  |            |
| Disorder                 | Yes                                                              | 44 (33.3)  |
|                          | No                                                               | 88 (66.7)  |
| Diagnosed Psychiatric    |                                                                  |            |
| Condition                | Depression                                                       | 28 (21.2)  |
|                          | Anxiety                                                          | 5 (3.8)    |
|                          | Depression & Anxiety                                             | 8 (6.1)    |
|                          | Post-traumatic stress distress (PTSD) with or without Depression | 2 (1.5)    |
|                          | Psychosis                                                        | 1 (0.8)    |
|                          | No Condition                                                     | 88 (66.7)  |
| Clinical Diagnosis of a  |                                                                  |            |
| Neurological Condition   | Yes                                                              | 8 (6.1)    |
|                          | No                                                               | 123 (93.2) |
|                          | Unreported                                                       | 1 (0.8)    |
| Diagnosed Neurological   |                                                                  |            |
| Condition                | Epilepsy                                                         | 2 (1.5)    |
|                          | Migraine                                                         | 1 (0.8)    |
|                          | Vulvodynia                                                       | 1 (0.8)    |

|                                  |            |
|----------------------------------|------------|
| Fibromyalgia                     | 1 (0.8)    |
| Myalgic Encephalomyelitis (M.E.) | 2 (1.5)    |
| Neuropathy                       | 1 (0.8)    |
| No condition                     | 124 (93.9) |

---
